# Supplementary material for: Expression of inhibitory receptors by B cells in chronic human infectious diseases restricts responses to membrane-associated antigens
Source: PubMed Central journal article supplement — Sci Adv. 2020 Jul 24;6(30):eaba6493. doi: 10.1126/sciadv.aba6493 (PMC7380957; doi:10.1126/sciadv.aba6493), 2020-07-24
Supplement: aba6493_SM.pdf [file aba6493_SM.pdf]

## Supplementary Materials for

### **Expression of inhibitory receptors by B cells in chronic human infectious diseases restricts responses to membrane-associated antigens**

Abhijit A. Ambegaonkar, Kihyuck Kwak, Haewon Sohn, Javier Manzella-Lapeira, Joseph Brzostowski, Susan K. Pierce\*

\*Corresponding author. Email: [spierce@nih.gov](mailto:spierce@nih.gov)

Published 24 July 2020, *Sci. Adv.* **6**, eaba6493 (2020)

DOI: [10.1126/sciadv.aba6493](https://doi.org/10.1126/sciadv.aba6493)

#### **This PDF file includes:**

Figs. S1 to S3

SUPPLEMENTARY MATERIALS

Figure S1

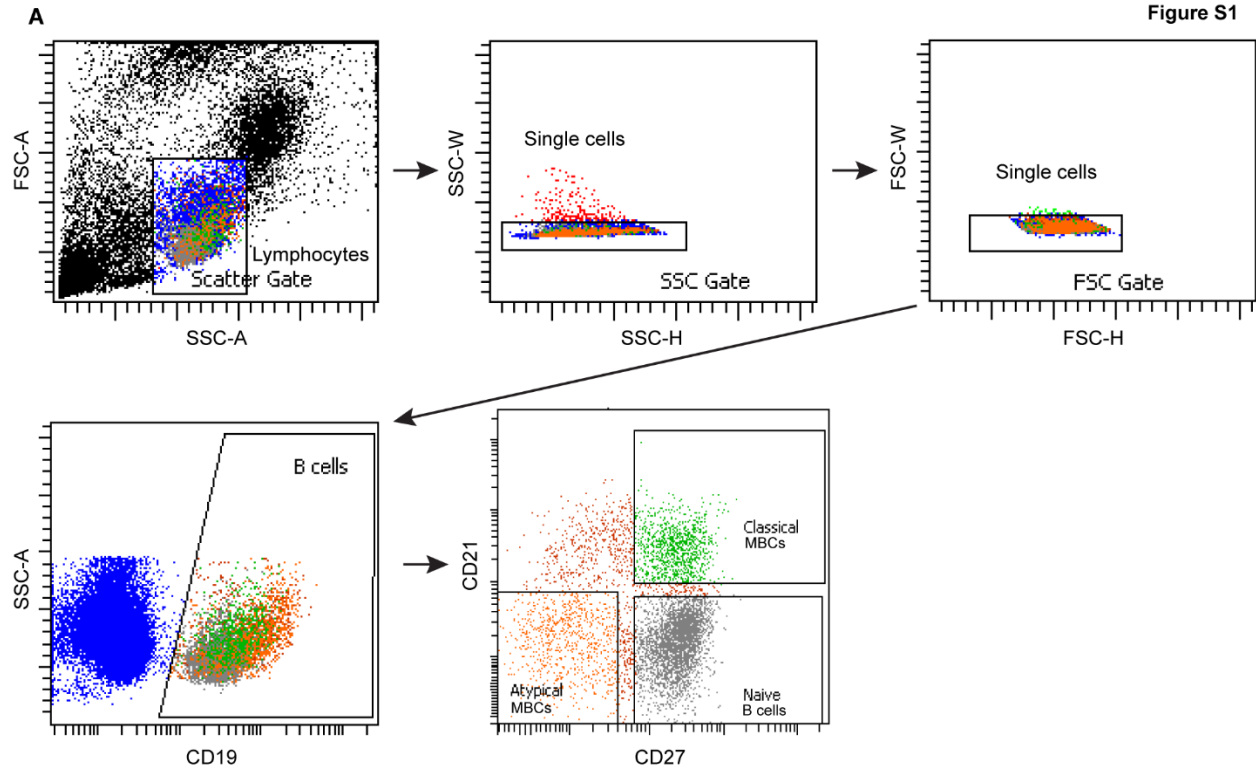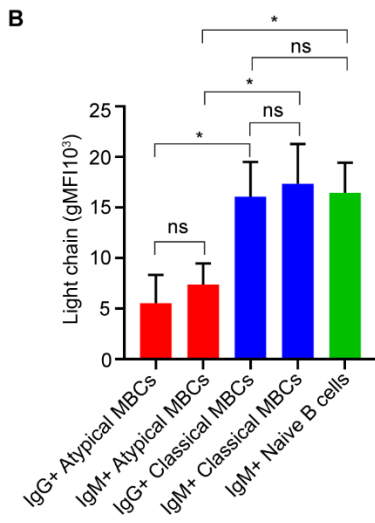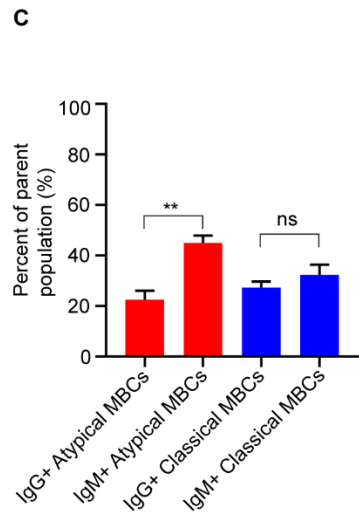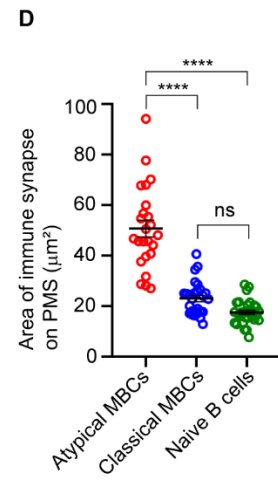

**Figure S1. FACS sorting of PBMC into Naïve, Classical MBCs and Atypical MBCs.**

(A) Malian PBMC were stained using fluorescently labelled antibodies against CD19, CD21 and CD27 and FACS sorted into atypical MBC (CD19+CD21-CD27-), classical MBCs (CD19+CD21+CD27+) and naïve B cells (CD19+CD21+CD27-).

(B) Comparison of surface BCR (gMFI of light chain) by IgG+ or IgM+ atypical MBCs (red bars), IgG+ or IgM+ classical MBCs (blue bars) and IgM+ Naïve B cells (green bar) (n = 3). The error bars indicate S.E.M. Data were analyzed using paired t test. \*, P < 0.05; ns, not significant.

(C) Comparison of percentage of IgG+ or IgM+ B cells within atypical MBCs (red bars) and IgG+ or IgM+ B cells within classical MBCs (blue bars) (n = 3). The error bars indicate S.E.M. Data were analyzed using paired t test. \*\*, P < 0.005; ns, not significant.

(D) Quantification of spread area by atypical MBCs (red circles), classical MBCs (blue circles) and naïve B cells (green circles) on PMS containing anti- $\lambda/\kappa$  upon incubation for 90 mins at 37 °C. The error bars indicate S.E.M. Data were analyzed using a one-way ANOVA with Tukey's correction. \*\*\*\*, P < 0.0001; ns, not significant.

Figure S2

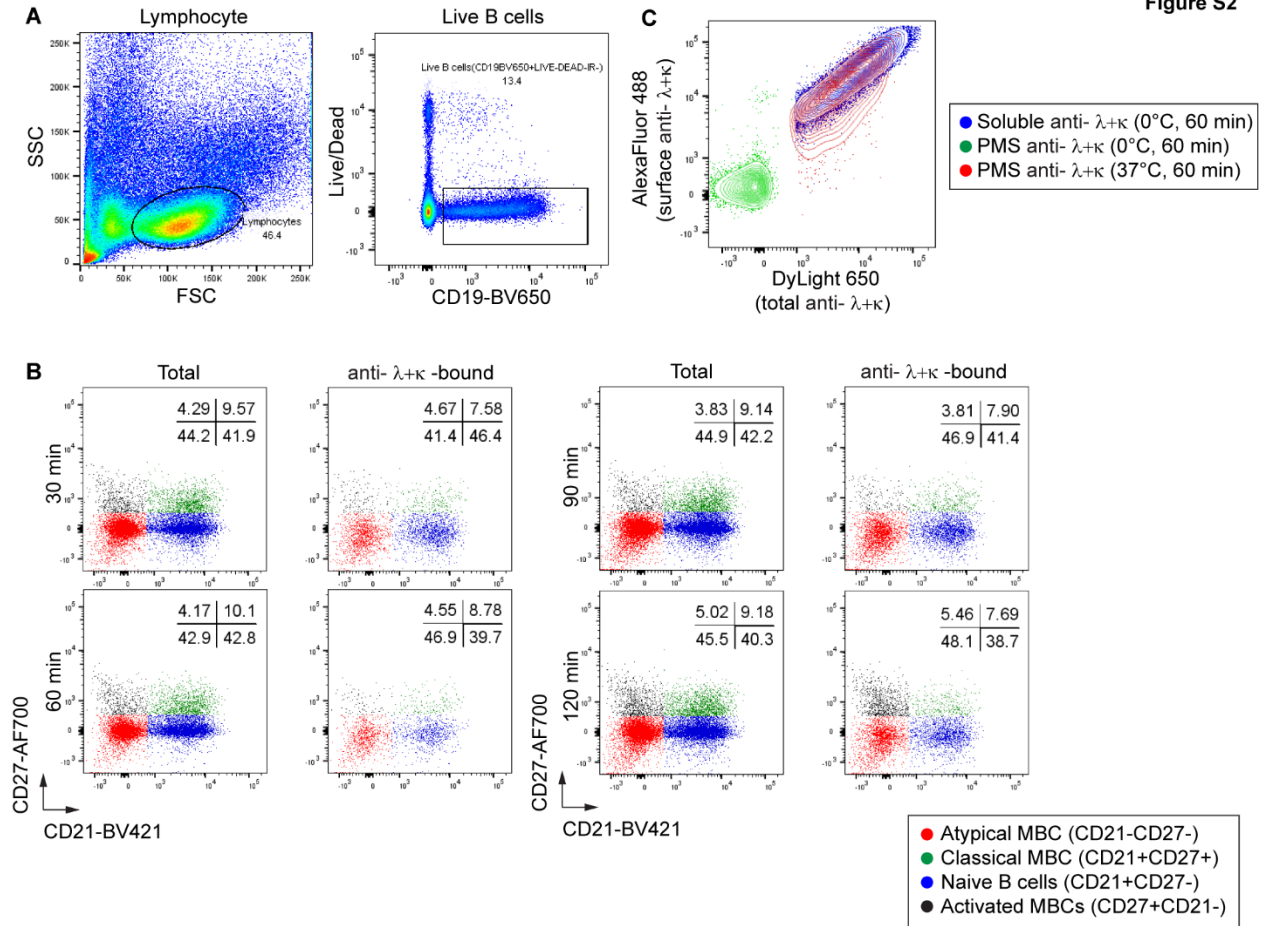

**Figure S2. The proportion of B cell subsets within antigen-bound cells were similar with that of B cell input over the period of incubation on PMS**

(A) Malian PBMCs ( $1 \times 10^6$  per well) were added to 8-well lab-tek chamber layered with PMS-anti- $\lambda/\kappa$  on the bottom and incubated for given times at 37°C to let the B cells respond to the PMS- anti- $\lambda/\kappa$ . At a given time, cells were harvested by brief pipetting and washed once for removal of unbound antigen, stained with CD19-BV650, CD21-BV421 and CD27-Alexa700 antibodies, and analyzed by flow cytometry to identify naïve B cells (CD21+CD27-), classical MBCs (CD21+CD27+), atypical MBCs (CD21-CD27-), and activated MBCs (CD21-CD27+). The flow cytometry plots indicate live B cell gating strategy from the PBMCs after harvesting and staining with B cell subset markers. LIVE/DEAD marker for exclusion of dead cells and CD19-BV650 for B cells were used for live B cell gating.

(B) PBMCs were incubated for 30, 60, 90, and 120 min on PMS- anti- $\lambda/\kappa$  at 37°C and harvested, stained and analyzed for the percentage of each B cell subset, naïve B cells, classical MBCs, atypical MBCs, and activated MBCs among B cell population. Shown as numbers in plot is the percentage of each subset, classical MBCs, naïve B cells, atypical MBCs and activated MBCs, in the order of clockwise direction starting from right and top quadrant.

(C) B cells were incubated either with soluble anti- $\lambda/\kappa$  on ice or with PMS- anti- $\lambda/\kappa$  on ice or 37°C for 60 min. The same anti- $\lambda/\kappa$  labeled with biotin and DyLight650 was used for both soluble and membrane-bound. After washing out unbound anti- $\lambda/\kappa$ , cells were further stained with streptavidin-Alexa488 to detect anti- $\lambda/\kappa$  remained on surface. Contour plots of B cells in which anti- $\lambda/\kappa$  bound only on surface (Soluble anti- $\lambda/\kappa$  (0°C, 60min)) vs mixed between surface and internal (PMS-anti- $\lambda/\kappa$  (37°C, 60min)) revealed by Ag-DyLight650 for total bound anti- $\lambda/\kappa$  and streptavidin-Alexa488 for anti- $\lambda/\kappa$  remained on surface. Membrane-tethered anti- $\lambda/\kappa$  binding

on B cells did not occur on ice (PMS anti- $\lambda/\kappa$  (0°C, 60min)), but soluble anti- $\lambda/\kappa$  did bind (Soluble anti- $\lambda/\kappa$  (0°C, 60min)).

Figure S3

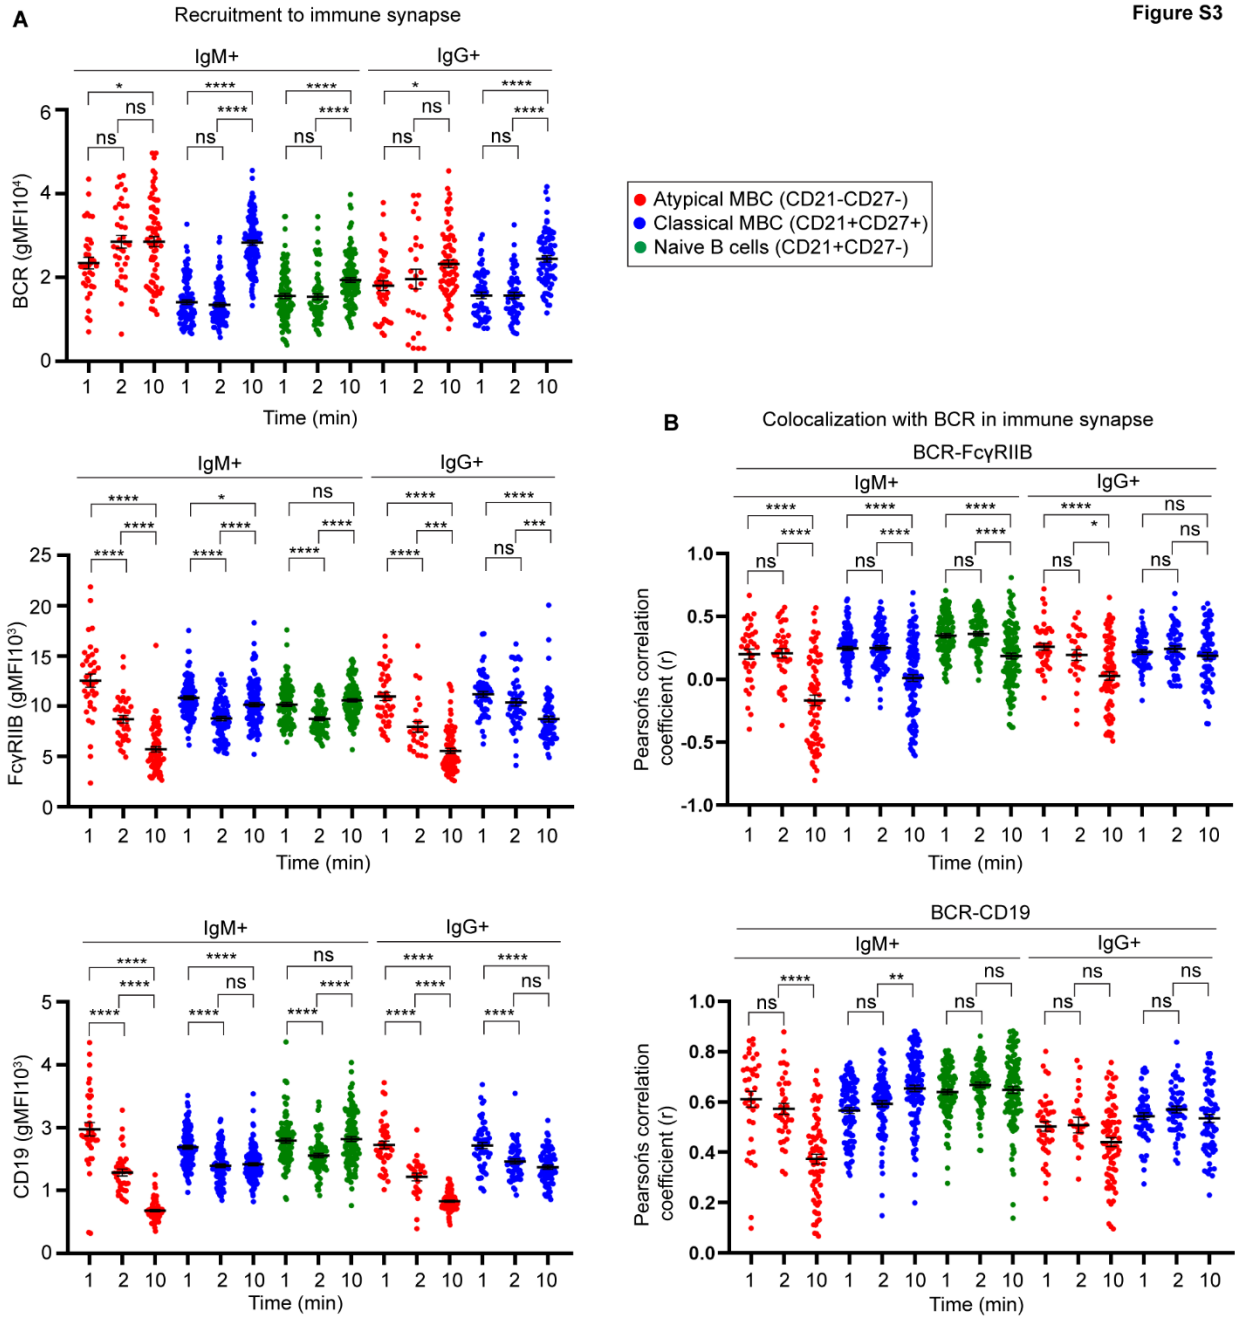

**Figure S3. Quantification for recruitment and colocalization of BCR, CD19 and Fc $\gamma$ RIIB in the immunological synapse**

Atypical MBC, classical MBCs and naïve B cells were FACS sorted from PBMC, stained with DyLight594 conjugated Fab fragments of either anti-IgM or anti-IgG, and AlexaFluor 488 conjugated Fab fragments of anti-CD19 antibodies and activated on PLB containing anti- $\lambda/\kappa$  for 1 - 10 min, fixed and stained with antibodies recognizing Fc $\gamma$ RIIB and imaged on TIRFM.

(A) Quantification of MFI of BCR, Fc $\gamma$ RIIB and CD19 in the immune synapse formed by atypical MBCs (red dots), classical MBCs (blue dots) and naïve B cells (green dots) on PLB containing anti- $\lambda/\kappa$  for given time points.

(B) Colocalization of BCR with Fc $\gamma$ RIIB or CD19 within the immune synapse formed by atypical MBCs (red dots), classical MBCs (blue dots) and naïve B cells (green dots) upon activation on PLB containing anti- $\lambda/\kappa$ .

Data are representative of two experiments. The error bars indicate S.E.M. Data were analyzed using unpaired t test. \*, P < 0.05; \*\*, P < 0.01; \*\*\*, P < 0.001; \*\*\*\*, P < 0.0001; ns, not significant.
